# Supplementary material for: Ni supported CdIn2S4 spongy-like spheres: a noble metal free high-performance sunlight driven photocatalyst for hydrogen production
Source: Royal Society of Chemistry journal article supplement (doi:10.1039/c7cp06085h), 2017-01-01
Supplement: c7cp06085h1.pdf [file c7cp06085h1.pdf]

## Supporting Information

### **Ni Supported $\text{CdIn}_2\text{S}_4$ Spongy-like Spheres: A Noble Metal Free High-Performance Sunlight Driven Photocatalyst for Hydrogen Production**

Manh-Hiep Vu, Chinh-Chien Nguyen, M. Sakar and Trong-On Do\*

*Department of Chemical Engineering, Laval University, Québec, G1V 0A6, Canada*

\*E-mail: [trong-on.do@gch.ulaval.ca](mailto:trong-on.do@gch.ulaval.ca)

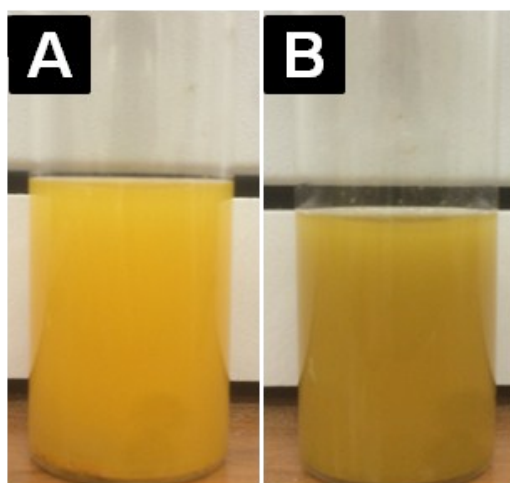

**Figure S1** Color of the  $\text{CdIn}_2\text{S}_4$  solution (A) before and (B) after photo-deposition of Ni.

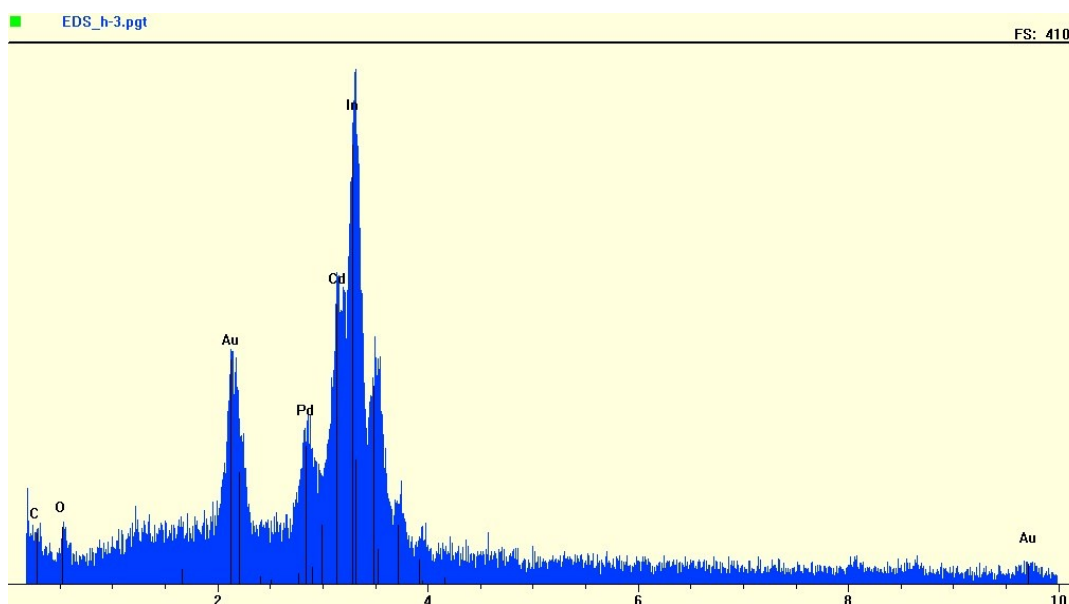

**Figure S2:** EDX spectrum of  $\text{CdIn}_2\text{O}_4$  spongy-like spheres.

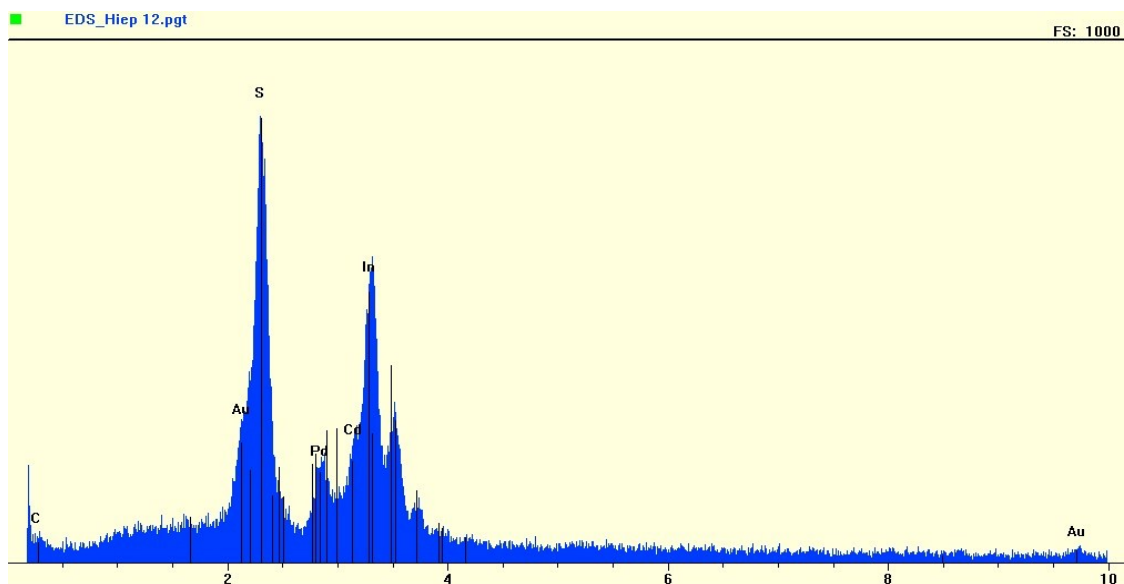

**Figure S3** EDS spectrum of  $\text{CdIn}_2\text{S}_4$  spongy-like spheres.

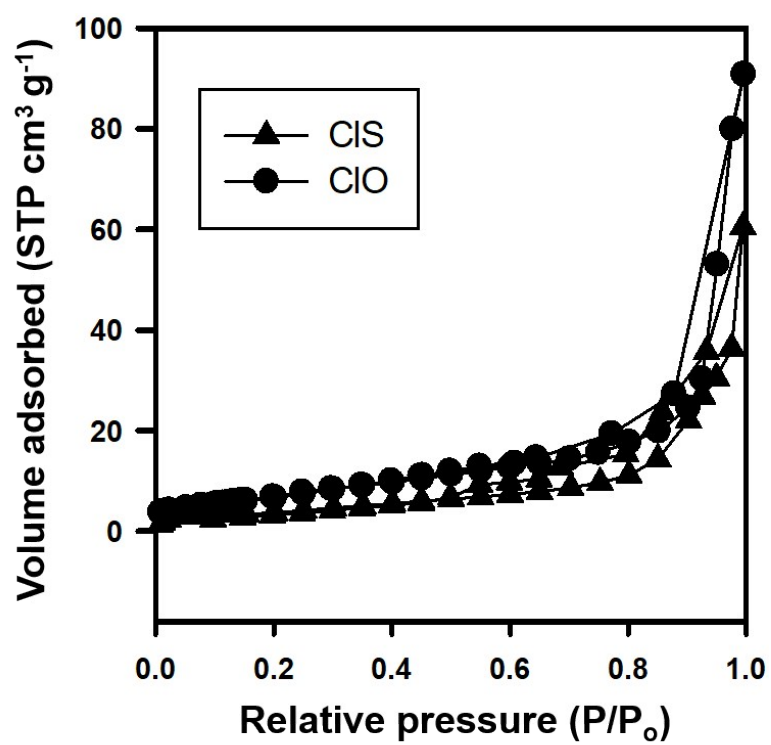

**Figure S4**  $\text{N}_2$  adsorption-desorption isotherm curves of  $\text{CdIn}_2\text{O}_4$  and  $\text{CdIn}_2\text{S}_4$  spongy-like spheres.

## **S1. Band edge potential calculations**

The band edge position of the material was calculated using the well known and standard empirical equations that widely reported in the literature.<sup>1-4</sup>

$$E_{CB} = X - E^e - 0.5E_g \quad (1)$$

$$E_{VB} = E_{CB} + E_g \quad (2)$$

Where, the  $X$  is the electronegativity of the semiconductor which is  $\text{CdIn}_2\text{S}_4$  and it was calculated using the following formula,

$$X = [x(A)^a x(B)^b x(C)^c]^{1/(a+b+c)} \quad (3)$$

Where A, B and C are the constituted elements, i.e. Cd, In and S respectively; and a, b, c are the respective number of atoms in the composition, which is 1, 2 and 4, respectively (as in  $\text{CdIn}_2\text{S}_4$ ).

$x(A)$  can be calculated as follows,

$$x(A) = [\text{Ionization energy of the element} + \text{electron affinity of the element}]/2$$

$$x(\text{Cd}) = [8.9938 + 0.725]/2 = 4.8594$$

$$x(\text{In}) = [5.78636 + 0.3]/2 = 3.0432$$

$$x(\text{S}) = [10.36001 + 2.07]/2 = 6.215$$

Substitute above values in Eqn. (3) as follows,

$$X(\text{CdIn}_2\text{S}_4) = [4.8594 \times (3.0432)^2 \times (6.215)^4]^{1/7}$$

$$X(\text{CdIn}_2\text{S}_4) = [67144.15]^{1/7} = 4.89$$

$$E_{CB} = 4.89 - 4.5 - (0.5 \times 2.23) = -0.73 \text{ eV}$$

$$E_{VB} = -0.725 + 2.23 = +1.50 \text{ eV}$$

## **S2. Apparent quantum efficiency of $\text{H}_2$ evolution**

The apparent quantum efficiency (AQE) of the photocatalyst depends on various parameters that include the measurement methods, reaction conditions, amount of photocatalyst taken, wavelength taken for the estimations, etc.<sup>5-7</sup>

The details of AQE calculation as follows;

The evolved H<sub>2</sub> molecules at the end of 3 h, for 15 mg of photocatalyst at the irradiation wavelength of 420 nm was found to be 0.383 μmol and accordingly, AQE was estimated using the following formula and it was found to be 3.35%.

AQE (%) = [Number of reacted electrons or holes]/[number of incident photons] x 100 = [2 x number of H<sub>2</sub> molecules evolved]/[number of incident photons] x 100

## References

1. M. V. Carevic, M. I. Comor, M. N. Mitric, T. S. Barudzija, S. P. Ahrenkiel and N. D. Abazovic, *CrystEngComm*, 2015, **17**, 8492-8499.
  2. A. Habibi-Yangjeh and M. Shekofteh-Gohari, *Separation and Purification Technology*, 2017, **184**, 334-346.
  3. S. Li, Y.-H. Lin, B.-P. Zhang, J.-F. Li and C.-W. Nan, *J. Appl. Phys.*, 2009, **105**, 054310.
  4. M. Mousavi, A. Habibi-Yangjeh and M. Abitorabi, *J. Colloids and Interface Sci.*, 2016, **480**, 218-231.
  5. Z. Jin, X. Zhang, Y. Li, S. Li and G. Lu, *Catal. Commun.*, 2007, **8**, 1267-1273.
  6. A. Tanaka, K. Hashimoto and H. Kominami, *Chem. Commun.*, 2017, **53**, 4759-4762.
  7. H. Kisch and D. Bahnemann, *J. Phys. Chem. Lett.*, 2015, **6**, 1907-1910.
-
